# Supplementary material for: Novel selective catalyst derived from uniform clustered NaY zeolite microspheres
Source: Royal Society of Chemistry journal article supplement (doi:10.1039/c3ta10483d), 2013-01-01
Supplement: c3ta10483d.pdf [file c3ta10483d.pdf]

## Supporting information

**Table S1.** The basic parameters of smoking experiment for cigarettes added by zeolites.

| Sample  | Weight<br>(mg/cig) | Pressure<br>drop<br>(mmWC) | CO<br>(mg/cig) | Puffs<br>(cig <sup>-1</sup> ) | NNN<br>(ng/cig) | NNK<br>(ng/cig) | NAT<br>(ng/cig) | NAB<br>(ng/cig) |
|---------|--------------------|----------------------------|----------------|-------------------------------|-----------------|-----------------|-----------------|-----------------|
| CY0.1   | 964                | 129.3                      | 14.77          | 8.1                           | 53.98           | 14.31           | 52.89           | 2.30            |
| CY0.2   | 967                | 136.5                      | 14.61          | 8.1                           | 47.24           | 9.44            | 49.59           | 2.26            |
| CY0.3   | 971                | 132.0                      | 15.37          | 7.7                           | 48.94           | 10.17           | 48.87           | 2.12            |
| CY0.4   | 972                | 138.9                      | 15.20          | 7.9                           | 51.06           | 12.81           | 47.47           | 2.13            |
| NaY     | 958                | 134.6                      | 15.12          | 7.8                           | 49.05           | 8.36            | 43.41           | 1.59            |
| control | 925                | 129.1                      | 14.13          | 7.2                           | 68.23           | 43.41           | 55.61           | 2.17            |

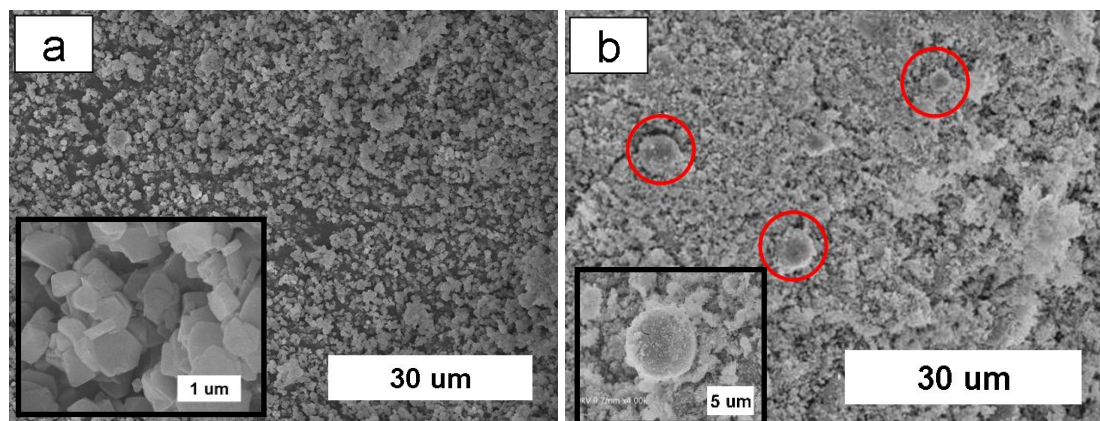

**Figure S1.** SEM images of (a) normal NaY zeolite and (b) the clustered zeolite microsphere synthesized with TMAOH/Si ratio of 0.025.

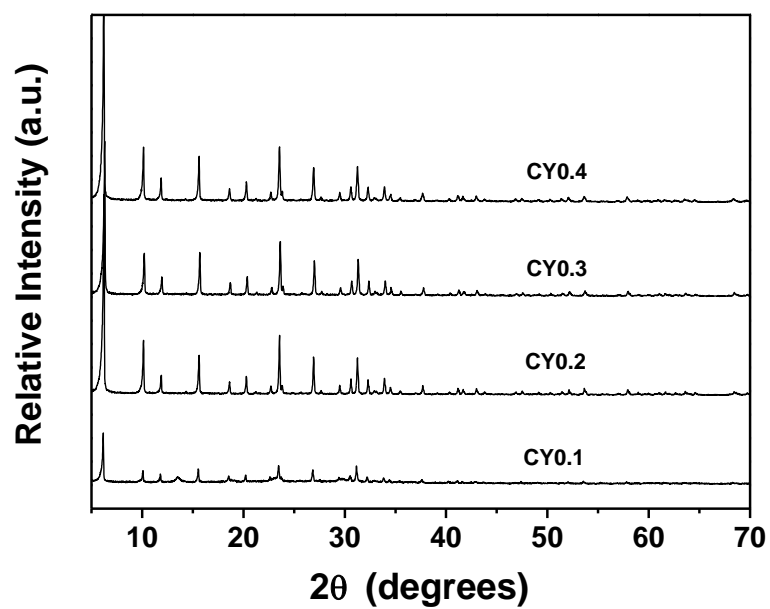

**Figure S2.** The wide-angle XRD patterns of the calcined CY series samples.

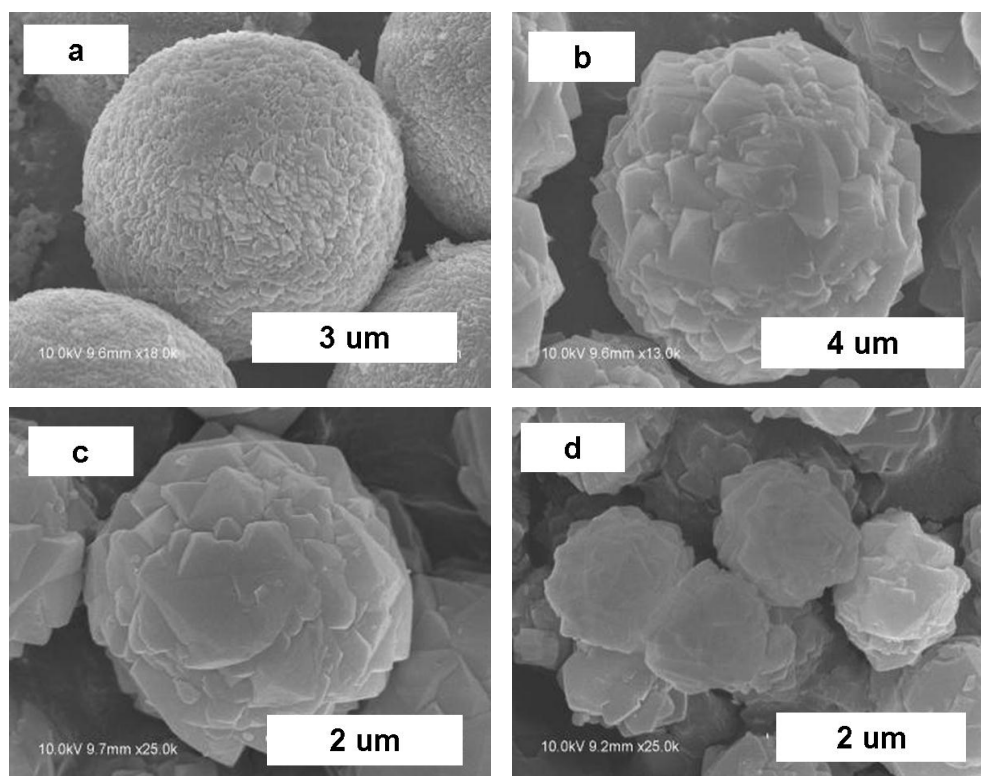

**Figure S3.** SEM images of the calcined CY series sample: (a) CY0.1, (b) CY0.2, (c) CY0.3 and (d) CY0.4.

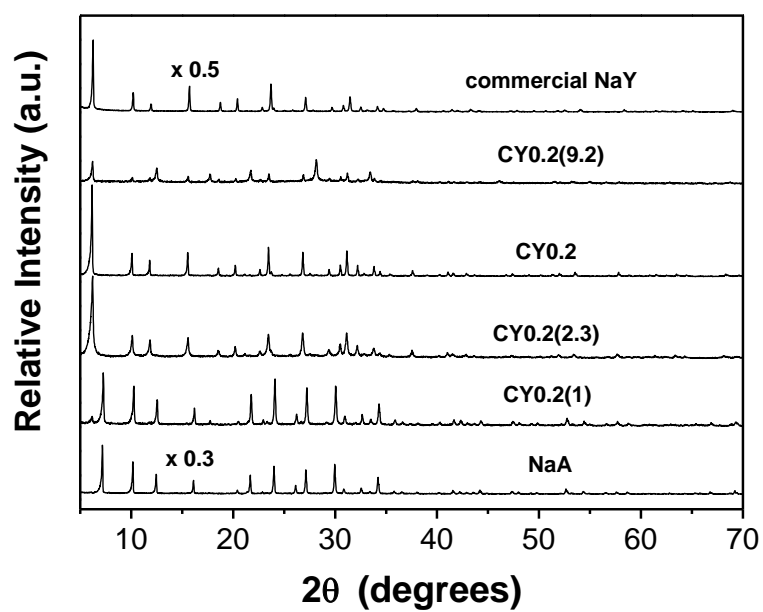

**Figure S4.** Wide-angle XRD patterns of the CY0.2 sample with different Si/Al ratio in the synthetic gel.

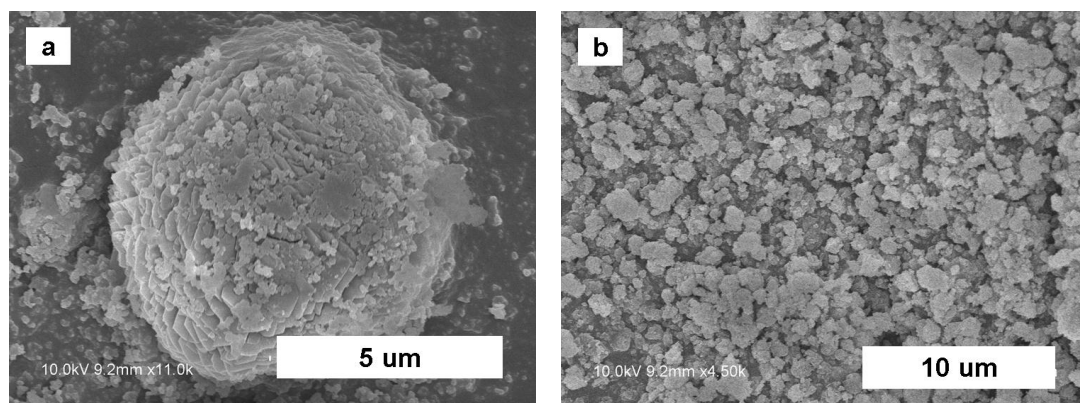

**Figure S5.** SEM images of the CY0.2 sample with Si/Al ratio of (a) 2.3 and (b) 9.2 in synthetic gel.

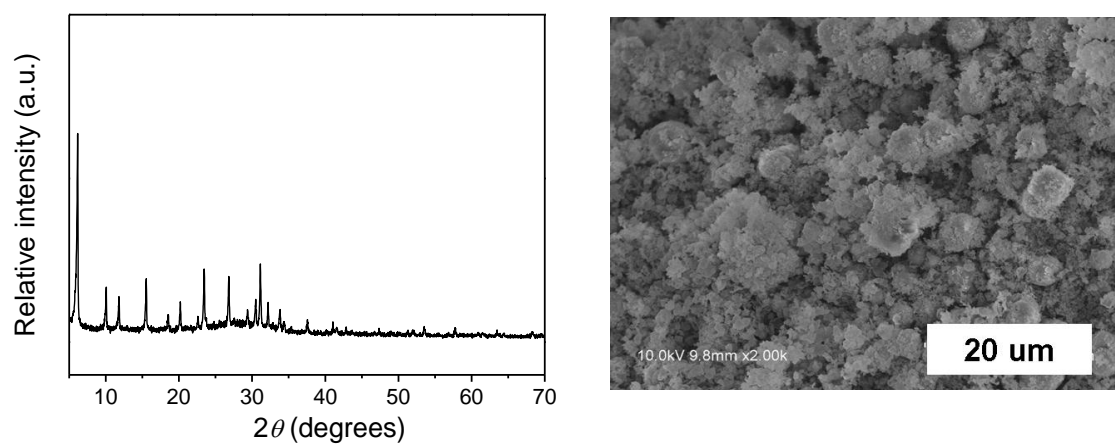

**Figure S6.** The XRD pattern and SEM image of sample added with TMAOH before mixing solution A and B.
